# Supplementary material for: O 3 –NO y photochemistry in boundary layer polluted plumes: insights from the MEGAPOLI (Paris), ChArMEx/SAFMED (North West Mediterranean) and DACCIWA (southern West Africa) aircraft campaigns
Source: Royal Society of Chemistry journal article supplement (doi:10.1039/d1ea00093d), 2022-01-01
Supplement: d1ea00093d1.pdf [file d1ea00093d1.pdf]

1 **Supplementary Material of O<sub>3</sub>-NO<sub>y</sub> photochemistry in boundary layer polluted plumes:**  
2 **insights from the MEGAPOLI (Paris), ChArMEx/SAFMED (North West**  
3 **Mediterranean) and DACCIIWA (southern West Africa) aircraft campaigns**

4 B. Thera et al.

5

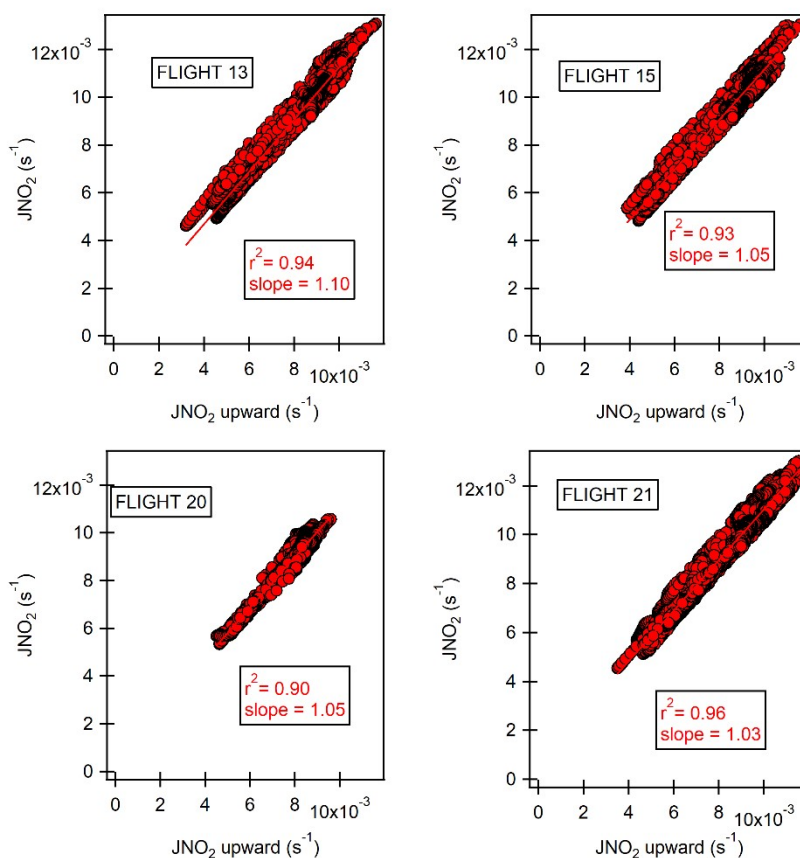

6

7 **Figure S1:** Relationship between  $J(\text{NO}_2)_{\text{total}}$  and  $J(\text{NO}_2)_{\text{upward}}$  from marine flights of ChArMEx aircraft campaign  
8 in summer 2014.

9

10

11

1

2

**Table S2:** Flights selected for this study

|                 | <b>Flight number</b> | <b>Date</b> | <b>Local Time</b>     | <b>Ozone level</b>                 | <b>Sector and/or type</b>                       |
|-----------------|----------------------|-------------|-----------------------|------------------------------------|-------------------------------------------------|
| <b>MEGAPOLI</b> | 25                   | 07/01/2009  | 11:39:40-<br>15:27:36 | Very important<br>Mean : 73.6 ppbv | South-West                                      |
|                 | 27                   | 07/10/2009  | 11:08:43-<br>14:58:02 | Low<br>Mean : 39.3 ppbv            | East                                            |
|                 | 30                   | 07/16/2009  | 11:41:26-<br>15:21:45 | Important<br>Mean : 52.5 ppbv      | North                                           |
|                 | 32                   | 07/21/2009  | 11:04:31-<br>14:47:50 | Important<br>Mean : 60.1 ppbv      | North                                           |
|                 | 33                   | 07/25/2009  | 11:02:01-<br>16:47:10 | Low<br>Mean :31.1 ppbv             | East                                            |
|                 | 36                   | 07/29/2009  | 11:40:02-<br>15:23:11 | Important<br>Mean : 52.5 ppbv      | North                                           |
|                 | <b>DACCIWA</b>       | 19          | 07/01/2016            | 10:22:24-<br>13:49:12              | Low<br>Mean : 34.4 ppbv                         |
| 32              |                      | 07/12/2016  | 13:38:24-<br>16:58:24 | Low<br>Mean : 37.4 ppbv            | Cloud, Accra City, Biogenic,<br>Biomass-Burning |
| 36              |                      | 07/16/2016  | 11:34:48-<br>14:52:00 | Low<br>Mean : 34.8 ppbv            | Cloud, Accra City                               |
| <b>SAFMED</b>   | 46                   | 07/24/2013  | 12:49:14-<br>14:58:16 | Important<br>Mean : 63.7 ppbv      | Genova-Cagliari                                 |
|                 | 47                   | 07/24/2013  | 16:46:50-<br>18:14:35 | Important<br>Mean :63.7 ppbv       | Tyreman sea                                     |

3

4

1

2

**Table S3:** Values of the rate constants used in the calculation of the Leighton ratio.

| Flights         | $K_{O_3+NO}$ ( $cm^3 molecule^{-1} s^{-1}$ ) |                          |                           |                          | $K_{HO_2+NO}$ ( $cm^3 molecule^{-1} s^{-1}$ ) |                          |                           |                          |
|-----------------|----------------------------------------------|--------------------------|---------------------------|--------------------------|-----------------------------------------------|--------------------------|---------------------------|--------------------------|
|                 | Min<br>$\times 10^{-14}$                     | Max<br>$\times 10^{-14}$ | Mean<br>$\times 10^{-14}$ | STD<br>$\times 10^{-15}$ | Min<br>$\times 10^{-12}$                      | Max<br>$\times 10^{-12}$ | Mean<br>$\times 10^{-12}$ | STD<br>$\times 10^{-14}$ |
| <b>MEGAPOLI</b> |                                              |                          |                           |                          |                                               |                          |                           |                          |
| 25              | 1.35                                         | 2.04                     | 1.81                      | 1.00                     | 8.10                                          | 8.72                     | 8.28                      | 9.18                     |
| 27              | 1.20                                         | 1.67                     | 1.54                      | 9.01                     | 8.40                                          | 8.92                     | 8.54                      | 9.95                     |
| 30              | 1.30                                         | 1.95                     | 1.76                      | 1.21                     | 8.17                                          | 8.78                     | 8.33                      | 11.6                     |
| 32              | 1.33                                         | 2.03                     | 1.84                      | 1.19                     | 8.10                                          | 8.75                     | 8.26                      | 10.8                     |
| 33              | 1.48                                         | 1.72                     | 1.62                      | 2.49                     | 8.35                                          | 8.58                     | 8.45                      | 2.35                     |
| 36              | 1.31                                         | 1.89                     | 1.73                      | 8.93                     | 8.22                                          | 8.77                     | 8.35                      | 8.52                     |
| <b>SAFMED</b>   |                                              |                          |                           |                          |                                               |                          |                           |                          |
| 46&47           | 1.79                                         | 1.96                     | 1.90                      | 3.10                     | 8.16                                          | 8.30                     | 8.21                      | 2.44                     |
| <b>DACCIWA</b>  |                                              |                          |                           |                          |                                               |                          |                           |                          |
| 19              | 1.64                                         | 2.08                     | 1.92                      | 9.40                     | 8.08                                          | 8.43                     | 8.19                      | 7.54                     |
| 32              | 1.59                                         | 2.07                     | 1.91                      | 1.10                     | 8.08                                          | 8.48                     | 8.20                      | 9.04                     |
| 36              | 1.63                                         | 2.18                     | 1.93                      | 1.28                     | 8.00                                          | 8.44                     | 8.19                      | 10.5                     |

3

1 **Table S4:** Statistics of the Leighton ratio values found in this study inside and outside the plume. The  
 2  $\Phi$  values are reported during the whole flight and in the plume and the percentages within, lower and  
 3 higher than  $PSS \pm \sigma$  [0.68-1.32]. The magnitude of rapid changes in NO, NO<sub>2</sub>, ozone and  $J(NO_2)$  are also  
 4 reported when detected. A rapid change corresponds to a relative difference higher than 20% between  
 5 two consecutive airborne data.

| N° | $\Phi$ range during the whole flight | MEGAPOLI : inside the plume                                 |                                      |                                                                                                                                                                                               |                                                                                                                                      |
|----|--------------------------------------|-------------------------------------------------------------|--------------------------------------|-----------------------------------------------------------------------------------------------------------------------------------------------------------------------------------------------|--------------------------------------------------------------------------------------------------------------------------------------|
|    |                                      | [NO <sub>x</sub> ] threshold<br>$\Phi$ range<br>$\Phi$ mean | $\Phi$ values within PSS [0.68–1.32] | $\Phi$ values < 0.68 (PSS– $\sigma$ )<br>Detected rapid changes in the $\Phi$ calculation terms                                                                                               | $\Phi$ values > 1.32 (PSS+ $\sigma$ )<br>Detected rapid changes in the $\Phi$ calculation terms                                      |
| 25 | [0.35-20.07]                         | [NO <sub>x</sub> ] > 4.5 ppbv                               | 52.6 %                               | 36.8 %<br>Rapid change<br>[NO] : up to 74%.<br>[NO <sub>2</sub> ] : up to 52 %                                                                                                                | 10.5 %<br>Rapid change :<br>[NO] : 42 and 74%.<br>[NO <sub>2</sub> ] 21 and 31%                                                      |
|    |                                      | $\Phi \in [0.41-1.46]$                                      |                                      |                                                                                                                                                                                               |                                                                                                                                      |
|    |                                      | Mean : 0.83<br>$\pm 0.30$                                   |                                      |                                                                                                                                                                                               |                                                                                                                                      |
| 27 | [0.30-9.82]                          | NO <sub>x</sub> > 3 ppbv                                    | 7.9 %                                | 0%                                                                                                                                                                                            | 92.1%<br>Rapid change:<br>$J(NO_2)$ : up to 77%<br>[NO] : up to 196 %<br>[NO <sub>2</sub> ] : up to 1060 %                           |
|    |                                      | $\Phi \in [0.81-2.89]$                                      |                                      |                                                                                                                                                                                               |                                                                                                                                      |
|    |                                      | Mean : 1.85<br>$\pm 0.51$                                   |                                      |                                                                                                                                                                                               |                                                                                                                                      |
| 30 | [0.12-3.92]                          | NO <sub>x</sub> > 3 ppbv                                    | 90%                                  | 5 %<br>Rapid change:<br>$J(NO_2)$ : up to 26 %<br>[NO] up to 33 %<br>[NO <sub>2</sub> ] up to 34 %                                                                                            | 5%<br>Rapid change<br>$J(NO_2)$ : up to 72 %<br>[NO <sub>2</sub> ] up to 63 %                                                        |
|    |                                      | $\Phi \in [0.61-1.35]$                                      |                                      |                                                                                                                                                                                               |                                                                                                                                      |
|    |                                      | Mean : 0.95<br>$\pm 0.17$                                   |                                      |                                                                                                                                                                                               |                                                                                                                                      |
| 32 | [0.16-2.83]                          | NO <sub>x</sub> > 2 ppbv                                    | 77.6 %                               | 22.4 % ; 14.3 % can be explained by :<br>Rapid change<br>$J(NO_2)$ : up to 26 %<br>[NO] : up to 78 %<br>[NO <sub>2</sub> ] : up to 62 %                                                       | 0%                                                                                                                                   |
|    |                                      | $\Phi \in [0.57-1.03]$                                      |                                      |                                                                                                                                                                                               |                                                                                                                                      |
|    |                                      | Mean : 0.77 $\pm$ 0.11                                      |                                      |                                                                                                                                                                                               |                                                                                                                                      |
| 33 | [0.52-5.11]                          | NO <sub>x</sub> > 2.5 ppbv                                  | 12.7 %                               | 0 %                                                                                                                                                                                           | 87.3 % ; 54 % can be explained by<br>Rapid change<br>$J(NO_2)$ : up to 116%<br>[NO] : up to 101%<br>[NO <sub>2</sub> ] : up to 105 % |
|    |                                      | $\Phi \in [0.75-3.93]$                                      |                                      |                                                                                                                                                                                               |                                                                                                                                      |
|    |                                      | Mean : 1.93<br>$\pm 0.69$                                   |                                      |                                                                                                                                                                                               |                                                                                                                                      |
| 36 | [0.51-4.92]                          | NO <sub>x</sub> > 3 ppbv                                    | 43.14 %                              | 56.86 %<br>Where 33.33% are linked to<br>Rapid change:<br>$J(NO_2)$ : up to 20 %<br>[NO] : up to 103 %<br>[NO <sub>2</sub> ] : up to 61 %<br>23.5% of the data are not linked to any of these | 0%                                                                                                                                   |
|    |                                      | $\Phi \in [0.51-1.08]$                                      |                                      |                                                                                                                                                                                               |                                                                                                                                      |
|    |                                      | Mean : 0.71<br>$\pm 0.12$                                   |                                      |                                                                                                                                                                                               |                                                                                                                                      |

1

| N° | Φ range during the whole flight | CHARMEX/SAFMED : inside the plume                 |                                 |                                                                                 |                                                                              |
|----|---------------------------------|---------------------------------------------------|---------------------------------|---------------------------------------------------------------------------------|------------------------------------------------------------------------------|
|    |                                 | [NO <sub>x</sub> ] threshold<br>Φ range<br>Φ mean | Φ values within PSS [0.68–1.32] | Φ values < 0.68 (PSS–σ)<br>Detected rapid changes in the Φ calculation terms    | Φ values > 1.32 (PSS+σ)<br>Detected rapid changes in the Φ calculation terms |
| 46 | [[0.60-1.78]                    | NA<br>Mean : 1.08<br>±0.30                        | 89.5 %                          | 1.9 %<br>Rapid change:<br>[NO] : up to 154 %<br>[NO <sub>2</sub> ] : up to 75 % | 8.6 %<br>Rapid change<br>[NO] : up to 58 %                                   |
| 47 | [4.74-8.67]                     | NA<br>7.13 ± 1.44                                 | 0.0%                            | 0.0%                                                                            | 100 %                                                                        |

2

| N° | Φ range during the whole flight | DACCIWA : inside the plume                        |                                 |                                                                                 |                                                                                                                                            |
|----|---------------------------------|---------------------------------------------------|---------------------------------|---------------------------------------------------------------------------------|--------------------------------------------------------------------------------------------------------------------------------------------|
|    |                                 | [NO <sub>x</sub> ] threshold<br>Φ range<br>Φ mean | Φ values within PSS [0.68–1.32] | Φ values < 0.68 (PSS–σ)<br>Detected rapid changes in the Φ calculation terms    | Φ values > 1.32 (PSS+σ)<br>Detected rapid changes in the Φ calculation terms                                                               |
| 19 | [0.06-10.5]                     | NO <sub>x</sub> > 4.5 ppbv                        | 45%                             | 10%<br>Rapid change:<br>[NO] : up to 7000%<br>[NO <sub>2</sub> ] : up to 1250 % | 45 %<br>Rapid change<br>[O <sub>3</sub> ] : 19%<br>[NO] : up to 46 %                                                                       |
|    |                                 | Φ ∈ [0.18-5.17]                                   |                                 |                                                                                 |                                                                                                                                            |
|    |                                 | Mean : 1.74<br>±1.24                              |                                 |                                                                                 |                                                                                                                                            |
| 32 | [0.12-8.60]                     | NO <sub>x</sub> > 4 ppbv                          | 33.3%                           | 6.7 %<br>Rapid change:<br>[NO] : 20%<br>[NO <sub>2</sub> ]: 24%                 | 60 %<br>Rapid change:<br>[NO] up to 652 %                                                                                                  |
|    |                                 | Φ ∈ [0.60-2.85]                                   |                                 |                                                                                 |                                                                                                                                            |
|    |                                 | Mean : 1.59±0.55                                  |                                 |                                                                                 |                                                                                                                                            |
| 36 | [0.13-7.03]                     | NO <sub>x</sub> > 1.5 ppbv                        | 16.7 %                          | 0%                                                                              | 83.3 %<br>61.1 % are linked to<br>Rapid change:<br>J(NO <sub>2</sub> ): up to 23 %<br>[NO] : up to 56 %<br>[NO <sub>2</sub> ] : up to 52 % |
|    |                                 | Φ ∈ [1.19-4.01]                                   |                                 |                                                                                 |                                                                                                                                            |
|    |                                 | Mean : 1.79±0.71                                  |                                 |                                                                                 |                                                                                                                                            |

3

4

1

**Table S5:** Aggregated values of the Leighton ratio from previous studies reported in the literature.

| Type                        | Location                                            | Period                        | $\Phi$                                                  | References |
|-----------------------------|-----------------------------------------------------|-------------------------------|---------------------------------------------------------|------------|
| Urban plume                 | Sarnia, Ontario, Canada                             | March 2017                    | 0.44-1.61                                               | 1          |
| Urban<br>Clear sky          | New Delhi, India                                    | October, 2014<br>May 2014     | 0.3-3.6 (mean = 1.01±0.52)<br>0.4-2.6 (mean = 0.89±0.4) | 2          |
| Urban                       | New Delhi, India                                    | December 2012                 | 0 0.8                                                   | 3          |
| Urban plume<br>Clean remote | Amazonas State, Brazil                              | July 2001                     | < 2<br>2.5-16                                           | 4          |
| Urban                       | Sakai City , Japan                                  | August, 2002                  | 0.5-1.3                                                 | 5          |
| Highly polluted<br>airmass  | North Norfolk Coast                                 | November 1993<br>October 1994 | 1<br>Up to 2                                            | 6          |
| Urban                       | Claremont, California                               | September 1980                | 0.3 – 2.1                                               | 7          |
| Urban, High sun             | Hawai                                               | Spring 1988                   | ≈ 2                                                     | 8          |
| Urban, High sun             | Hawai                                               | All seasons 1991-1992         | 1.5-2                                                   | 9          |
| Aircraft                    | Western and central North Pacific                   | October 1991                  | Median = 2.36                                           | 10         |
| Aircraft                    | Subtropical/tropical North and South Atlantic Ocean | August – September 1989       | 0.9-3 (mean)                                            | 11         |
| Remote Farmland, plants     | Backgarden Kaiping                                  | Summer<br>Autumn              | 2.3 ± 0.4<br>3.1 ± 1.4                                  | 12         |
| Clean background            | South Atlantic ocean                                | March 2007                    | Up to 15                                                | 13         |
| Farm (low NOx area)         | New England                                         | Summer 2004                   | 1-5.9                                                   | 14         |
| Rural                       | Germany                                             | March 1999-<br>Decamber 2002  | 2.5 – 5.7                                               | 15         |
| Rural                       | Germany                                             | Summer 1998                   | 1.1-1.5 for NO > 1 ppb<br>2 for NO < 1 ppb              | 16         |
| Rural Agricultural site     | Germany                                             | August 1994                   | Mean =1.2, Max =1.85                                    | 17         |
| Rural                       | Alabama, USA                                        | July 1990                     | <2                                                      | 18         |

2

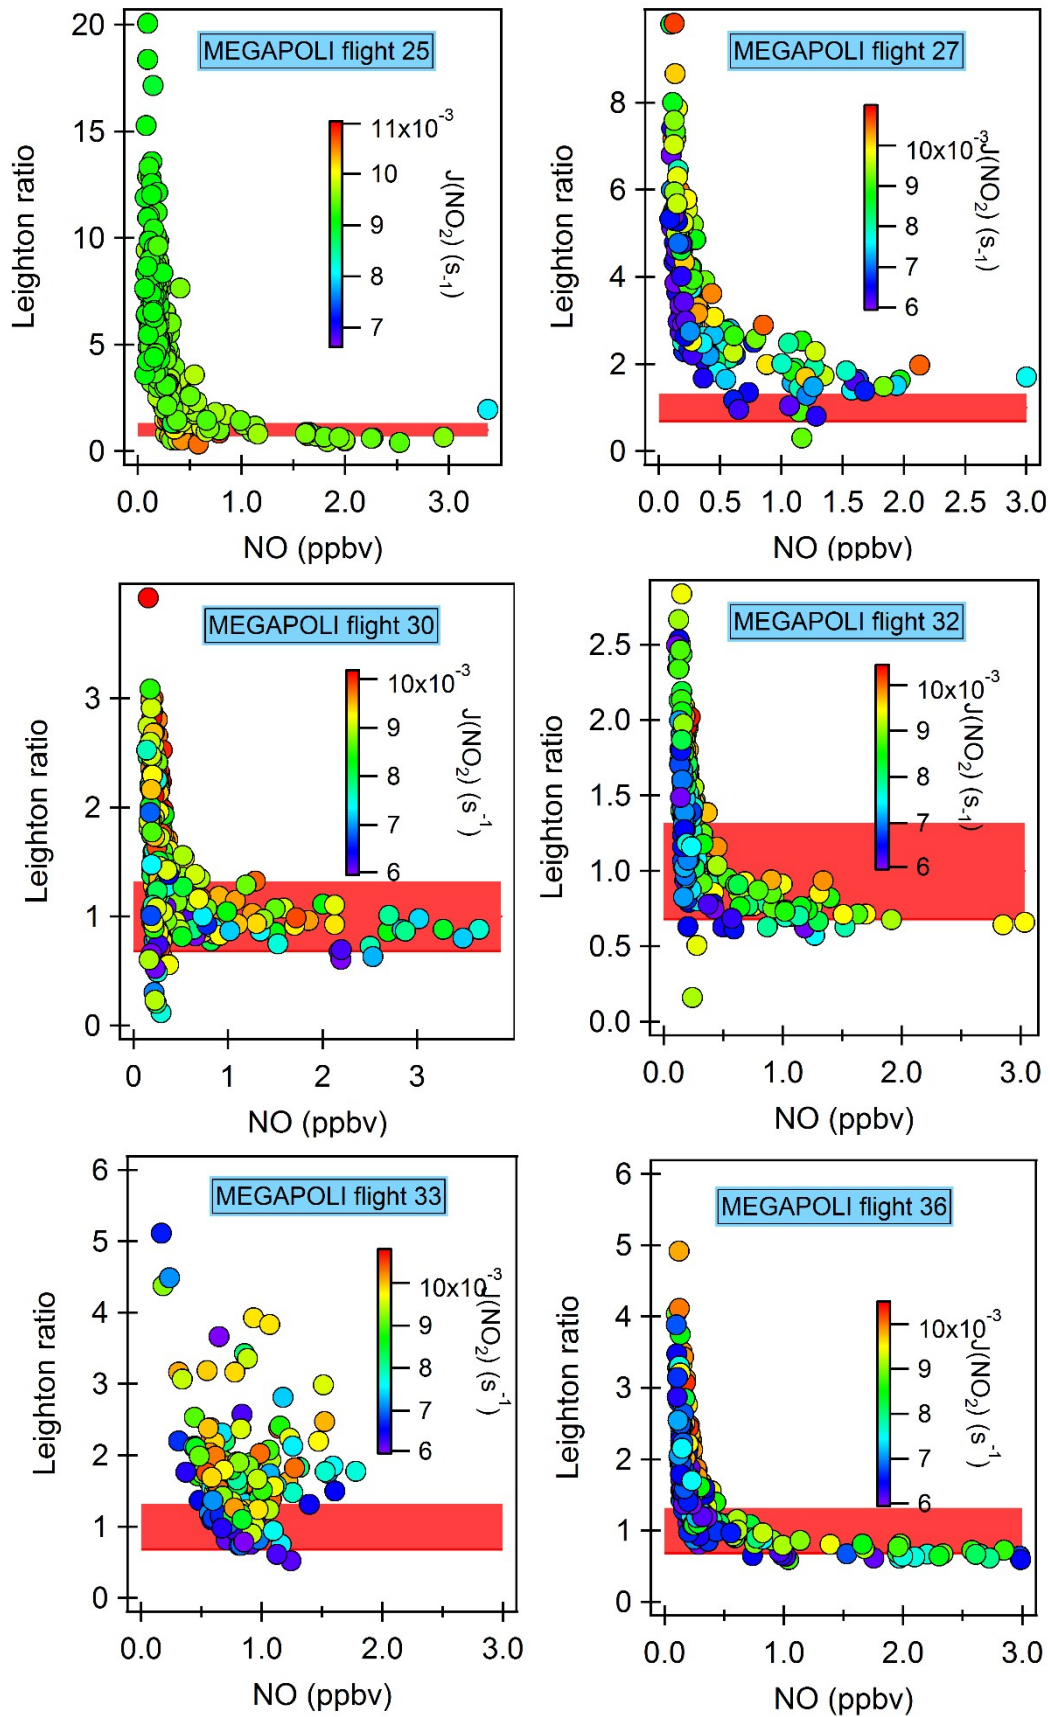

1

2 **Figure S6 :** Dependence of the Leighton ratio on NO during MEGAPOLI. Scatterplots are color-coded with  $JNO_2$

3 The red area corresponds to the PSS at  $\pm 0.32$ .

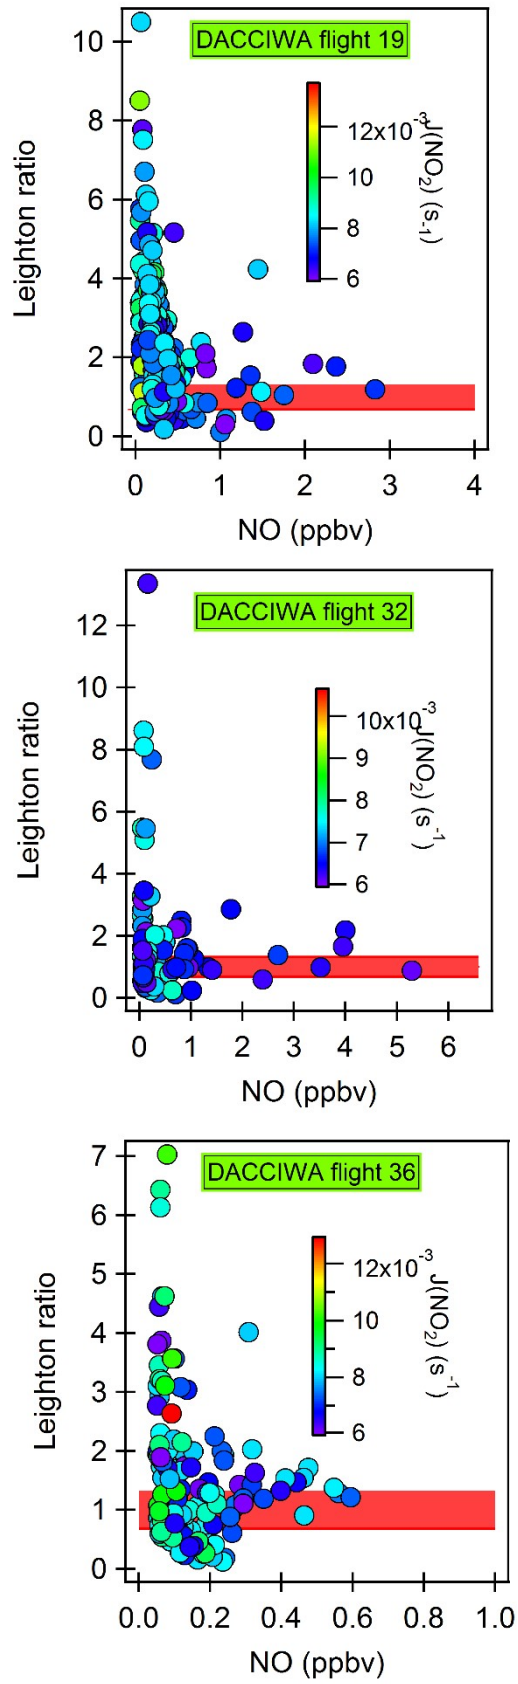

1

2 **Figure S7:** Dependence of the Leighton ratio on NO during DACCIIWA. . Scatterplots are color-coded with  $J\text{NO}_2$

3 The red area corresponds to the PSS at  $\pm 0.32$



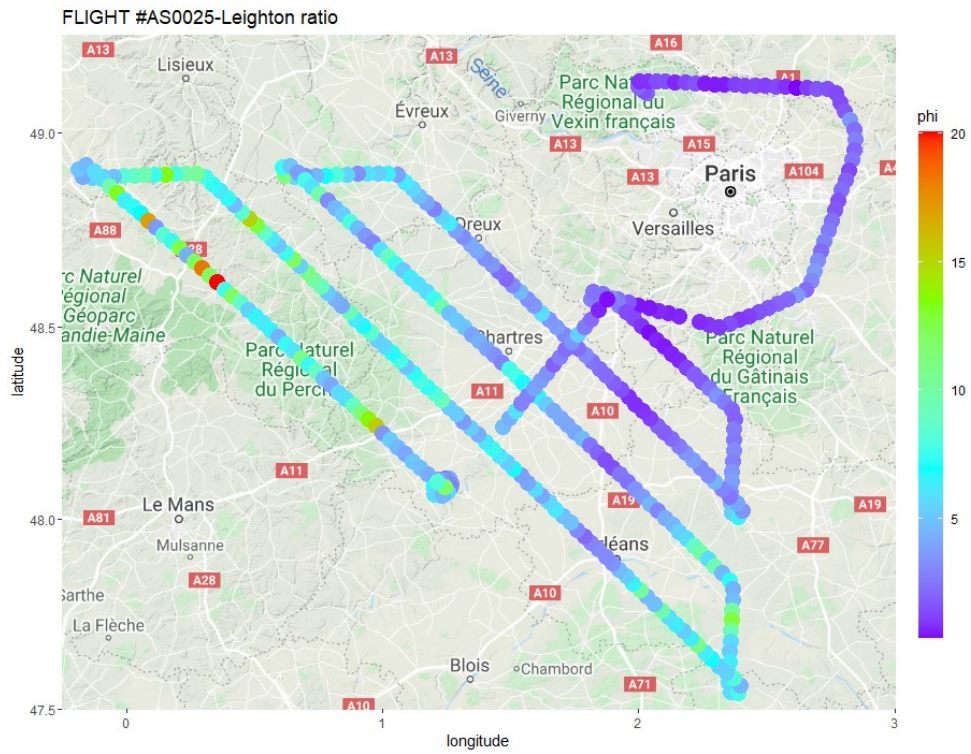

1

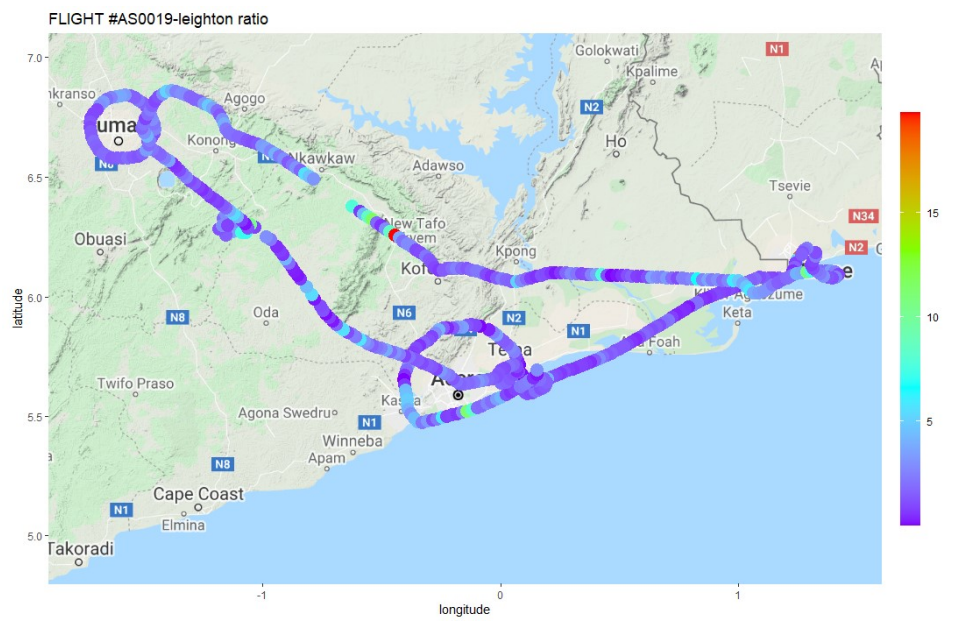

2

3 **Figure S8:** Plot trajectories of the Leighton ratio in Paris and in SWA

4

5

6

7

8

1 **Table S6:** Aggregated values of maximum peroxy radical mixing ratio and PO<sub>3</sub> found inside and outside the urban  
 2 plumes.

|                 | Flights   | Inside the plumes |                               | Outside the plumes |                               |
|-----------------|-----------|-------------------|-------------------------------|--------------------|-------------------------------|
|                 |           | [ROx]max in ppt   | PO <sub>3</sub> max in ppbv/h | [ROx]max in ppt    | PO <sub>3</sub> max in ppbv/h |
| <b>MEGAPOLI</b> | <b>25</b> | No production     | No production                 | 331.4              | 120                           |
|                 | <b>27</b> | 95.3              | 99.4                          | 572                | 56.5                          |
|                 | <b>30</b> | 21.2              | 13.4                          | 230.2              | 33.2                          |
|                 | <b>32</b> | No production     | No production                 | 199                | 21.5                          |
|                 | <b>33</b> | 129.0             | 86.4                          | 117.5              | 47.2                          |
|                 | <b>36</b> | No production     | No production                 | 389.6              | 32.7                          |
| <b>DACCIWA</b>  | <b>19</b> | 67.0              | 111.5                         | 102.3              | 17.4                          |
|                 | <b>32</b> |                   |                               | 115.0              | 9.7                           |
|                 | <b>36</b> | 247.9             | 27.6                          | 49.1               | 4.8                           |
| <b>SAFMED</b>   | <b>46</b> | 110.9             | 18.0                          | Non determined     | Non determined                |

3

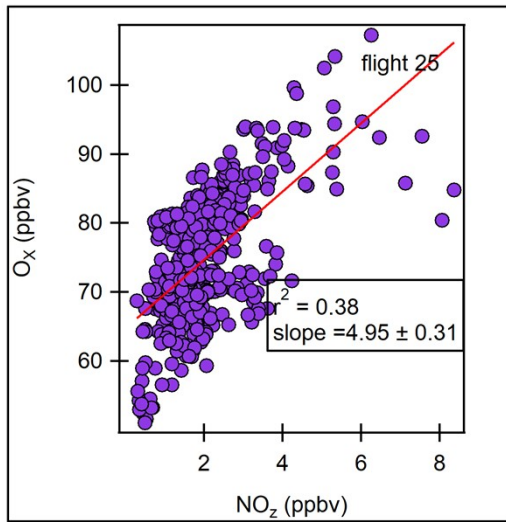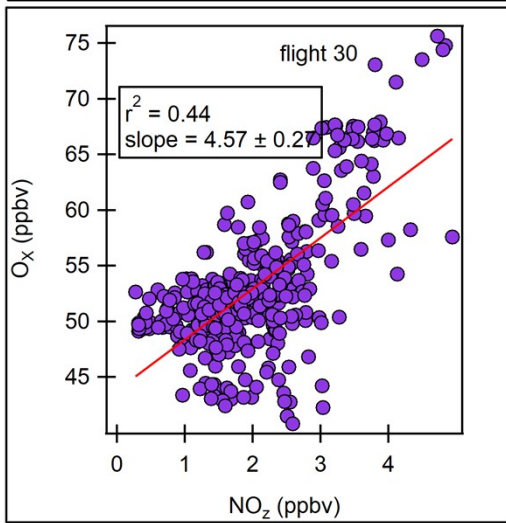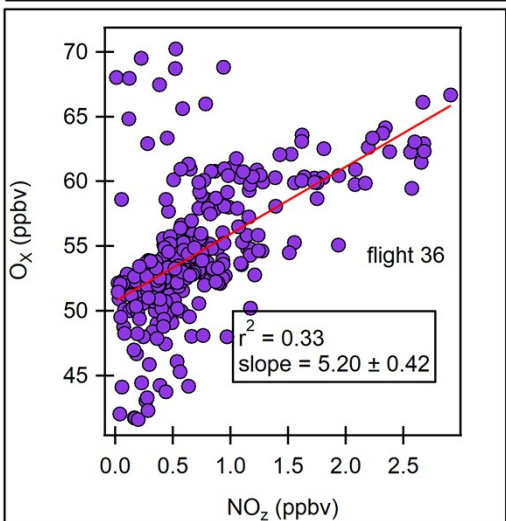

1

2 **Figure S9:**  $O_x$  ( $= O_3 + NO_2$ ) versus  $NO_z$  for flights 25, 27, 32 and 36 during MEGAPOLI.

3

**Table S7:** Aggregated values of OPE found in previous studies

| Location                       | Type                     | Period            | OPE         | References |
|--------------------------------|--------------------------|-------------------|-------------|------------|
| <b>Beijing, China</b>          | Urban                    | August 2008       | [3.9-9.7]   | 19         |
|                                | Mountain, rural          | July 2005         | [3 – 6]     | 20         |
|                                | Urban                    | August 2008       | 8           | 21         |
| <b>Scottia, Pennsylvania</b>   | Low NOx, rural           | Summer 1988       | 8.5         | 22         |
| <b>Phoenix, Arizona</b>        | Urban (aircraft)         | May and June 1998 | 2.7         | 23         |
| <b>Beijing, China</b>          | Urban                    | 1.1               | Winter 2007 | 24         |
| <b>Nashville, Tennessee</b>    | Urban plume              | [2.5 – 4]         | July 1995   | 25         |
| <b>New York states</b>         | Rural site in Addison    | 2000 – 2015       | [5 - 13]    | 26         |
|                                | Rural site in Witmington | 2015 – 2017       | 18          |            |
| <b>Beijing, China</b>          | Urban                    | Summer 2012       | 1-6.8       | 27         |
| <b>Durham, New Hampshire</b>   | Rural                    | August 2002       | [7.7 – 9.7] | 28         |
| <b>Beijing, China</b>          | Urban plume              | Summer 2008       | 4           | 29         |
|                                | Rural plume              |                   | 5.3         |            |
| <b>Nashville, New York</b>     | Rural                    | July 1996         | 10          | 30         |
|                                | Urban                    |                   | [2 – 4]     |            |
| <b>Tennessee</b>               | Power plant plume        | July, 7 1998      | [1.2-2.5]   | 31         |
| <b>Los Angeles, California</b> | Urban                    | May – june 2010   | 3.9 – 4.7   | 32         |
| <b>South USA</b>               | Urban                    | 1996 - 2015       | [ 2 - 3]    | 33         |
|                                | Suburban                 |                   | 2           |            |
|                                | rural                    |                   | [1-2]       |            |

- 1 Z. Y. W. Davis, S. Baray, C. A. McLinden, A. Khanbabakhani, W. Fujs, C. Csukat, J. Deboasz and R. McLaren, Estimation of NO<sub>x</sub> and SO<sub>2</sub> emissions from Sarnia, Ontario, using a mobile MAX-DOAS (Multi-AXis Differential Optical Absorption Spectroscopy) and a NO<sub>x</sub> analyzer, *Atmos. Chem. Phys.*, 2019, **19**, 13871–13889.
- 2 R. Masiwal, C. Sharma, D. K. Shukla, D. Sethi, S. R. Radhakrishnan, R. K. Kotnala and B. C. Arya, Photochemistry of ozone over urban area: a case study for Delhi City, *Indian J. Phys.*, 2019, **93**, 415–425.
- 3 D. M. Chate, S. D. Ghude, G. Beig, A. S. Mahajan, C. Jena, R. Srinivas, A. Dahiya and N. Kumar, Deviations from the O<sub>3</sub>-NO-NO<sub>2</sub> photo-stationary state in Delhi, India, *Atmos. Environ.*, 2014, **96**, 353–358.
- 4 Trebs, I., Mayol-Bracero, O. L., Pauliquevis, T., Kuhn, U., Sander, R., Ganzeveld, L., Meixner, F. X., Kesselmeier, J., Artaxo, P., & Andreae, M. O. (2012). Impact of the Manaus urban plume on trace gas mixing ratios near the surface in the Amazon Basin: Implications for the NO-NO<sub>2</sub>-O<sub>3</sub> photostationary state and peroxy radical levels. *Journal of Geophysical Research Atmospheres*, 117(5), 1–16. <https://doi.org/10.1029/2011JD016386>
- 5 H. Simon, A. Reff, B. Wells, J. Xing and N. Frank, Ozone Trends Across the United States over a Period of Decreasing NO<sub>x</sub> and VOC Emissions, *Environ. Sci. Technol.*, 2015, **49**, 186–195.
- 6 L. J. Carpenter, K. C. Clemitshaw, R. A. Burgess, S. A. Penkett, J. N. Cape and G. G. Mcfadyen, Investigation and evaluation of the NO<sub>x</sub>/O<sub>3</sub> photochemical steady state, *Atmos. Environ.*, 1998, **32**, 3353–3365.
- 7 Shetter, R. E., Stedman, D. H., and West, D. H. (1983). The NO/NO<sub>2</sub>/O<sub>3</sub> photostationary state in Claremont, California. *Journal of the Air Pollution Control Association*, 33(3), 212–214. <https://doi.org/10.1080/00022470.1983.10465566>
- 8 B. A. Ridley, S. Madronich, R. B. Chatfield, J. G. Walega, R. E. Shetter, M. A. Carroll and D. D. Montzka, Measurements and model simulations of the photostationary state during the Mauna Loa Observatory Photochemistry Experiment: Implications for radical concentrations and ozone production and loss rates, *J. Geophys. Res.*, 1992, **97**, 10375.
- 9 D. A. Hauglustaine, S. Madronich, B. A. Ridley, J. G. Walega, C. A. Cantrell and R. E. Shetter, at Mauna Loa Observatory during MLOPEX 2 • - k • [ O<sub>3</sub> ] [ NO ] [ NO ].
- 10 J. Crawford, D. Davis, G. Chen, J. Bradshaw, S. Sandholm, G. Gregory, G. Sachse, B. Anderson, J. Collins, D. Blake, H. Singh, B. Heikes, R. Talbot and J. Rodriguez, Photostationary state analysis of the NO<sub>2</sub>-NO system based on airborne observations from the western and central North Pacific, *J. Geophys. Res. Atmos.*, 1996, **101**, 2053–2072.
- 11 D. D. Davis, G. Chen, W. Chameides, J. Bradshaw, S. Sandholm, M. Rodgers, J. Schendal, S. Madronich, G. Sachse, G. Gregory, B. Anderson, J. Barrick, M. Shipham, J. Collins, L. Wade and D. Blake, A photostationary state analysis of the NO<sub>2</sub>-NO system based on airborne observations from the subtropical/tropical North and South Atlantic, *J. Geophys. Res.*, 1993, **98**, 23501.
- 12 Ma, Y., Lu, K., Chou, C. C. K., Li, X., and Zhang, Y. (2017). Strong deviations from the NO-NO<sub>2</sub>-O<sub>3</sub> photostationary state in the Pearl River Delta: Indications of active peroxy radical and chlorine radical chemistry. *Atmospheric Environment*, 163(2), 22–34. <https://doi.org/10.1016/j.atmosenv.2017.05.012>
- 13 Z. H. Beygi, H. Fischer, H. D. Harder, M. Martinez, R. Sander, J. Williams, D. M. Brookes, P. S. Monks and J. Lelieveld, Oxidation photochemistry in the Southern Atlantic boundary layer: Unexpected deviations of photochemical steady state, *Atmos. Chem. Phys.*, 2011, **11**, 8497–8513.
- 14 R. J. Griffin, P. J. Beckman, R. W. Talbot, B. C. Sive and R. K. Varner, Deviations from ozone photostationary state during the International Consortium for Atmospheric Research on Transport and Transformation 2004 campaign: Use of measurements and photochemical modeling to assess potential causes, *J. Geophys. Res. Atmos.*, 2007, **112**, 1–16.
- 15 Mannschreck, K., Gilge, S., Plass-Duelmer, C., Fricke, W., and Berresheim, H.: Assessment of the applicability of NO-NO<sub>2</sub>-O<sub>3</sub> photostationary state to long-term measurements at the Hohenpeissenberg GAW Station, Germany, *Atmos. Chem. Phys.*, 4, 1265–1277, <https://doi.org/10.5194/acp-4-1265-2004>, 2004.
- 16 Volz-Thomas, A., Pätz, H., Houben, N., Konrad, S., Mihelcic, D., Klüpfel, T., and Perner, D. (2003).

- Inorganic trace gases and peroxy radicals during BERLIOZ at Pabstthum: An investigation of the photostationary state of NO<sub>x</sub> and O<sub>3</sub>. *Journal of Geophysical Research*, 108(D4), 8248. <https://doi.org/10.1029/2001JD001255>
- 17 F. Rohrer, D. Brüning, E. S. Grobler, M. Weber, D. H. Ehhalt, R. Neubert, W. Schüßler and I. Levin, Mixing ratios and photostationary state of NO and NO<sub>2</sub> observed during the POPCORN field campaign at a rural site in Germany, *J. Atmos. Chem.*, 1998, 31, 119–137.
  - 18 C. A. Cantrell, J. G. Calvert, D. D. Parrish, F. C. Fehsenfeld, P. D. Goldan, W. Kuster, E. J. Williams, H. H. Westberg, G. Allwine and R. Martin, Peroxy Radicals As Measured in ROSE and Estimated From Photostationary State.
  - 19 Chou, C. C. K., Tsai, C. Y., Shiu, C. J., Liu, S. C., and Zhu, T. (2009). Measurement of NO<sub>y</sub> during campaign of air quality research in Beijing 2006 (CAREBeijing-2006): Implications for the ozone production efficiency of NO<sub>x</sub>. *Journal of Geophysical Research Atmospheres*, 114(1), 1–14. <https://doi.org/10.1029/2008JD010446>.
  - 20 Wang, T., Ding, A., Gao, J., and Wu, W. S. (2006). Strong ozone production in urban plumes from Beijing, China. *Geophysical Research Letters*, 33(21). <https://doi.org/10.1029/2006GL027689>
  - 21 Chou, C., Tsai, C., Chang, C., Lin, P., Liu, S., and Zhu, T., (2011). Photochemical production of ozone in Beijing during the 2008 Olympic Games. *Researchgate.Net*. <https://doi.org/10.5194/acpd-11-16553-2011>.
  - 22 Trainer, M. (1993). Correlation of ozone with NO<sub>y</sub> in photochemically aged air. *Journal of Geophysical Research*, 98(D2), 2917–2925. <https://doi.org/10.1029/92JD01910>
  - 23 Kleinman, Lawrence I., Daum, P. H., Lee, Y. N., Nunnermácker, L. J., Springston, S. R., Weinstein-Lloyd, J., and Rudolph, J. (2002). Ozone production efficiency in an urban area. *Journal of Geophysical Research Atmospheres*, 107(23). <https://doi.org/10.1029/2002JD002529>
  - 24 Lin, W., Xu, X., Ge, B., and Liu, X.: Gaseous pollutants in Beijing urban area during the heating period 2007–2008: variability, sources, meteorological, and chemical impacts, *Atmos. Chem. Phys.*, 11, 8157–8170, <https://doi.org/10.5194/acp-11-8157-2011>, 2011.
  - 25 Nunnermacker, L. J., Imre, D., Daum, P. H., Kleinman, L., Lee, Y.-N., Lee, J. H., Springston, S. R., Newman, L., Weinstein-Lloyd, J., Luke, W. T., Banta, R., Alvarez, R., Senff, C., Sillman, S., Holdren, M., Keigley, G. W., and Zhou, X. (1998). Characterization of the Nashville urban plume on July 3 and July 18, 1995. *Journal of Geophysical Research: Atmospheres*, 103(D21), 28129–28148. <https://doi.org/10.1029/98JD01961>
  - 26 Ninneman, M., Demerjian, K. L., and Schwab, J. J. (2019). Ozone Production Efficiencies at Rural New York State Locations: Relationship to Oxides of Nitrogen Concentrations. *Journal of Geophysical Research: Atmospheres*, 124(4), 2363–2376. <https://doi.org/10.1029/2018JD029932>
  - 27 Ge, B., Sun, Y., Liu, Y., Dong, H., Ji, D., Jiang, Q., Li, J., and Wang, Z. (2013). Nitrogen dioxide measurement by cavity attenuated phase shift spectroscopy (CAPS) and implications in ozone production efficiency and nitrate formation in Beijing, China. *Journal of Geophysical Research: Atmospheres*, 118(16), 9499–9509. <https://doi.org/10.1002/jgrd.50757>
  - 28 Griffin, R. J., Johnson, C. A., Talbot, R. W., Mao, H., Russo, R. S., Zhou, Y., and Sive, B. C. (2004). Quantification of ozone formation metrics at Thompson Farm during the New England Air Quality Study (NEAQS) 2002. *Journal of Geophysical Research D: Atmospheres*, 109(24), 1–14. <https://doi.org/10.1029/2004JD005344>
  - 29 Ge, B. Z., Xu, X. B., Lin, W. L., Li, J., and Wang, Z. F. (2012). Impact of the regional transport of urban Beijing pollutants on downwind areas in summer: ozone production efficiency analysis. *Tellus B: Chemical and Physical Meteorology*, 64(1), 17348. <https://doi.org/10.3402/tellusb.v64i0.17348>
  - 30 Kleinman, Lawrence I., Daum, P. H., Imre, D. G., Lee, J. H., Lee, Y. N., Nunnermacker, L. J., Springston, S. R., Weinstein-Lloyd, J., and Newman, L. (2000). Ozone production in the New York City urban plume. *Journal of Geophysical Research Atmospheres*, 105(D11), 14495–14511. <https://doi.org/10.1029/2000JD900011>
  - 31 Sillman, S. (2000). Ozone production efficiency and loss of NO<sub>x</sub> in power plant plumes: Sillman, Photochemical model and interpretation of measurements in Tennessee. *Journal of Geophysical Research: Atmospheres*, 105(D7), 9189–9202. <https://doi.org/10.1029/1999JD901014>
  - 32 Pollack, I. B., Ryerson, T. B., Trainer, M., Parrish, D. D., Andrews, A. E., Atlas, E. L., Blake, D. R.,

Brown, S. S., Commane, R., Daube, B. C., de Gouw, J. A., Dubé, W. P., Flynn, J., Frost, G. J., Gilman, J. B., Grossberg, N., Holloway, J. S., Kofler, J., Kort, E. A., Kuster, W. C., Lang, P. M., Lefer, B., Lueb, R. A., Neuman, J. A., Nowak, J. B., Novelli, P. C., Peischl, J., Perring, A. E., Roberts, J. M., Santoni, G., Schwarz, J. P., Spackman, J. R., Wagner, N. L., Warneke, C., Washenfelder, R. A., Wofsy, S. C., & Xiang, B. (2012). Airborne and ground-based observations of a weekend effect in ozone, precursors, and oxidation products in the California South Coast Air Basin. *Journal of Geophysical Research: Atmospheres*, 117(D21). [https://doi.org/10.1029/2011JD016772@10.1002/\(ISSN\)2169-8996.CALNEX1](https://doi.org/10.1029/2011JD016772@10.1002/(ISSN)2169-8996.CALNEX1)

- 33 Henneman, L. R. F., Shen, H., Liu, C., Hu, Y., Mulholland, J. A., and Russell, A. G. (2017). Responses in Ozone and Its Production Efficiency Attributable to Recent and Future Emissions Changes in the Eastern United States. *Environmental Science and Technology*, 51(23), 13797–13805. <https://doi.org/10.1021/acs.est.7b04109>
